# Supplementary material for: Nitrogen-doped carbon quantum dots for fluorescence sensing, anti-counterfeiting and logic gate operations
Source: Royal Society of Chemistry journal article supplement (doi:10.1039/d3nj04521h), 2023-11-21
Supplement: d3nj04521h1.pdf [file d3nj04521h1.pdf]

## Supporting Information

### **Nitrogen-doped carbon quantum dots for fluorescence sensing, anti-counterfeiting and logic gate operation**

Li Xu,<sup>a</sup> Yi Qian,<sup>a</sup> Lei Bao,<sup>a</sup> Wei Wang,<sup>a</sup> Nengmei Deng,<sup>a</sup> Li Zhang,<sup>a</sup> Guanglin Wang,<sup>a</sup> Xucheng Fu,<sup>\*a</sup> Wei Fu<sup>\*a</sup>

<sup>a</sup> Key Laboratory of Biomimetic Sensor and Detecting Technology of Anhui Province, West Anhui University, Lu'an 237012, China.

\* Corresponding author:

*E-mail address:* fxc8307@wxc.edu.cn; w-fu17@tsinghua.org.cn

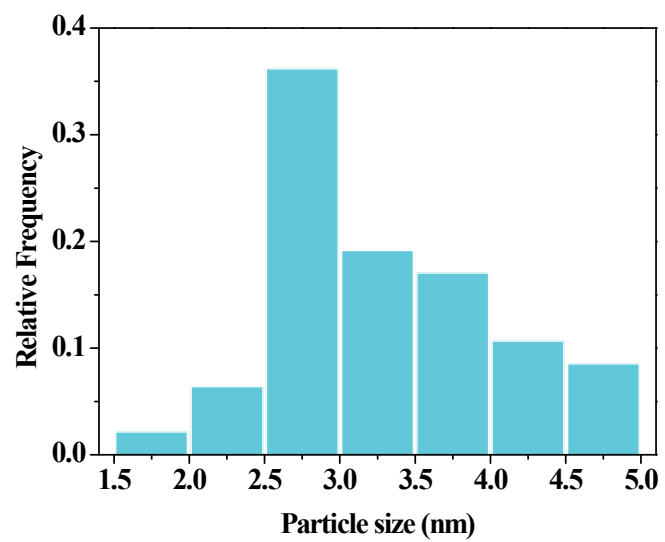

**Fig. S1** Average particle size of N-CQDs ( $3.27 \pm 0.69$  nm)

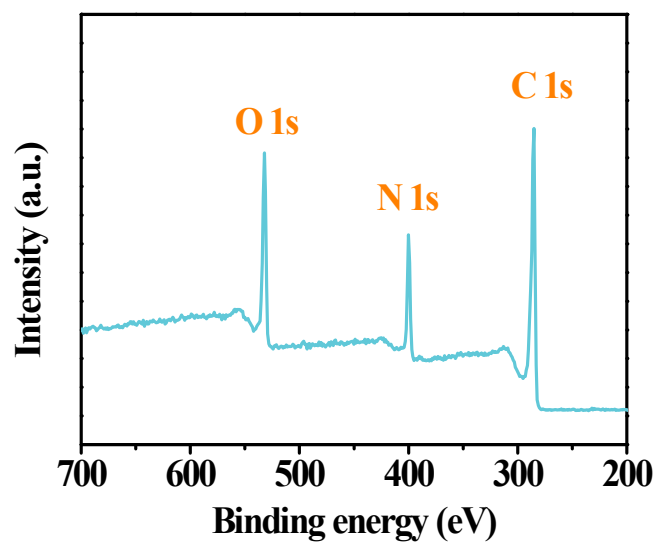

Fig. S2 XPS survey spectrum of N-CQDs

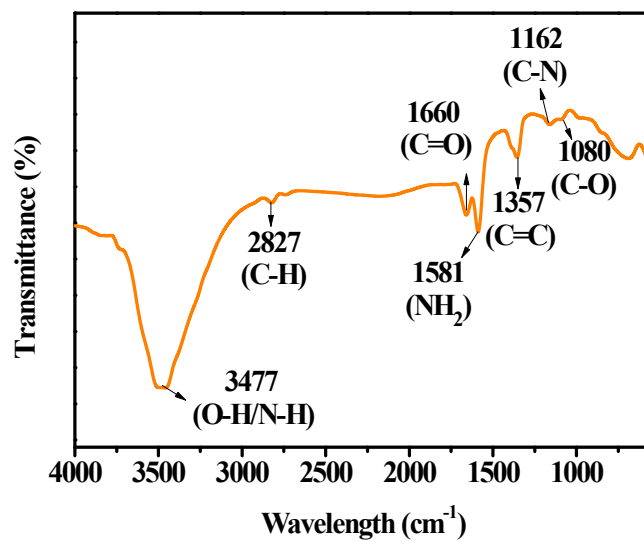

Fig. S3 FT-IR spectrum of N-CQDs

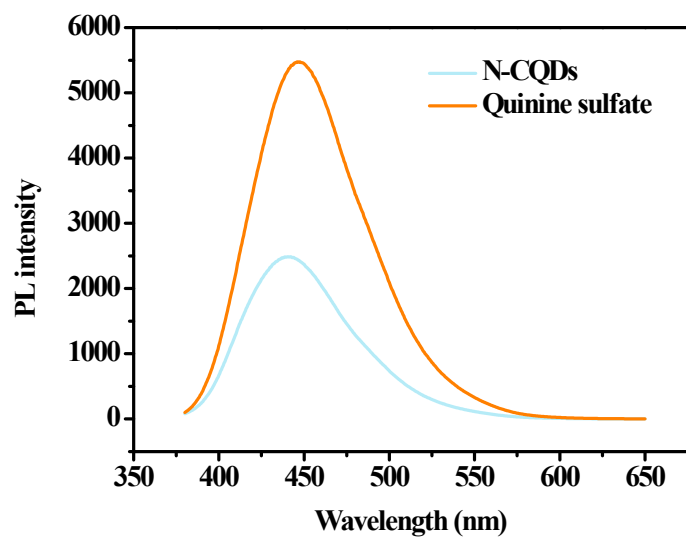

Fig. S4 PL spectrum of N-CQDs and quinine sulfate

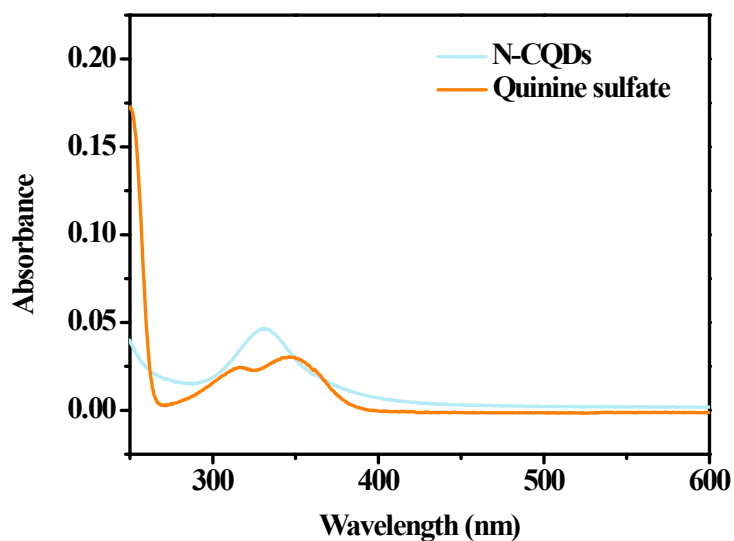

Fig. S5 UV-vis spectrum of N-CQDs and quinine sulfate

Table S1. Quantum yield of the N-CQDs

| Sample          | Abs. at 360nm | PL Integrated intensity | Refractive index of solvent (n) | PLQY (%) |
|-----------------|---------------|-------------------------|---------------------------------|----------|
| Quinine sulfate | 0.0298        | 448518.3                | 1.33                            | 54       |
| N-CQDs          | 0.0292        | 196834.1                | 1.33                            | 25.9     |

**Table S2** Comparison of the fluorescence quantum yield (QY) of CQDs.

| Quantum dots                                                    | QY (%) | References |
|-----------------------------------------------------------------|--------|------------|
| Nitrogen-doped carbon quantum dots (N-CQDs)                     | 18     | [1]        |
| N-doped carbon quantum dots (N-CQDs)                            | 21.9   | [2]        |
| Boron-nitrogen co-doped carbon quantum dots<br>(B, N-CQDs)      | 14.5   | [3]        |
| Nitrogen modified carbon quantum dots (N-CQDs)                  | 16.8   | [4]        |
| Nitrogen doped carbon quantum dot (N-CQDs)                      | 14.81  | [5]        |
| Nitrogen-rich carbon quantum dots (N-CQDs)                      | 25     | [6]        |
| Nitrogen doped carbon quantum dots (N-CQDs)                     | 12.33  | [7]        |
| Nitrogen-doped carbon quantum dots (N-CQDs)                     | 17.5   | [8]        |
| Nitrogen-doped carbon quantum dots (N-CQDs)                     | 22.14  | [9]        |
| N-doped carbon quantum dots (CQDs)                              | 9      | [10]       |
| Nitrogen, phosphorus codoped carbon quantum dots<br>(N, P-CQDs) | 21.7   | [11]       |
| N-CQDs                                                          | 25.9   | This work  |

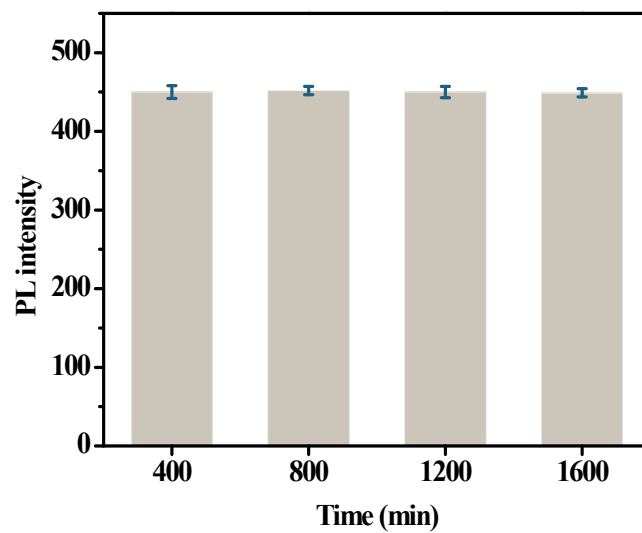

**Fig. S6** Stability testing of N-CQDs

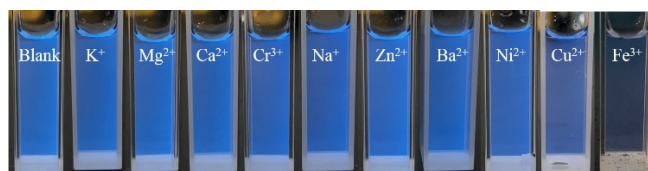

**Fig. S7** Fluorescence photos of different metal ions detected by N-CQDs

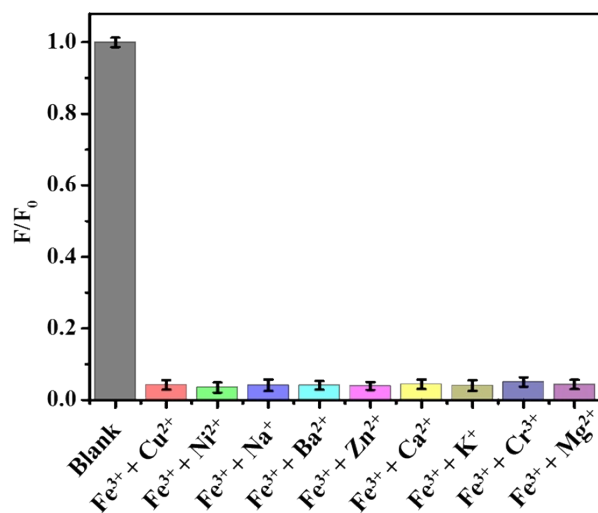

**Fig. S8** Interference diagram for Fe<sup>3+</sup> detection. The Fe<sup>3+</sup> concentration is 100 μM, and the other ions are 300 μM.

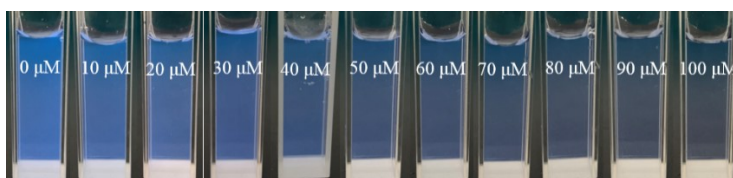

**Fig. S9** Fluorescence photos of N-CQDs detecting different concentrations of Fe<sup>3+</sup>

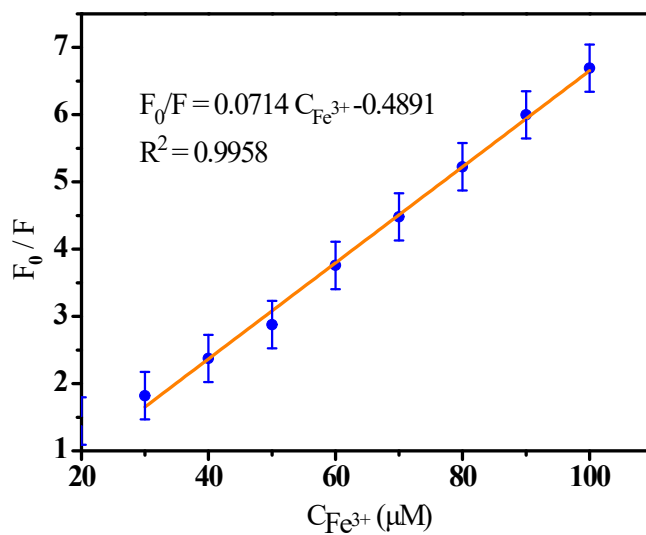

**Fig. S10** Linear relationship of fluorescence intensity as a function of Fe<sup>3+</sup> concentration in the range of 30-100 μM.

**Table S3.** Fe<sup>3+</sup> sensing properties with different fluorescent probes. Limit of detection LOD = 3σ/K (where σ is the standard deviation of the blank sample and K is the slope of the linear equation).

| Fluorescent probes                                     | Synthesis Method    | Excitation/Emission wavelength | Quantum yield | LOD      | References |
|--------------------------------------------------------|---------------------|--------------------------------|---------------|----------|------------|
| Carbon quantum dots (CQDs)                             | Hydrothermal method | 340/420 nm                     | 22.7 %        | 0.2 μM.  | [12]       |
| Mopan persimmons derived carbon quantum dots (MP-CQDs) | Hydrothermal method | 376/458 nm                     | 8.39 %        | 0.324 μM | [13]       |
| Nitrogen-doped carbon quantum dots (N-CQDs)            | Hydrothermal method | 350/425 nm                     | 22 %          | 3 μM     | [14]       |
| Carbon quantum dots (CQDs)                             | Hydrothermal method | 340/476 nm                     | 23.68 %       | 0.77 μM  | [15]       |
| Phosphorus-doped carbon quantum dots (N, P-CQDs)       | Hydrothermal method | 320/425 nm                     | 17.74 %       | 0.447 μM | [16]       |
| Carbon quantum dot (CQDs)                              | Hydrothermal method | 330/400 nm                     | 18.1 %        | 4 μM     | [17]       |
| N-CQDs                                                 | Solvothermal method | 340/442 nm                     | 25.9 %        | 0.28 μM  | This work  |

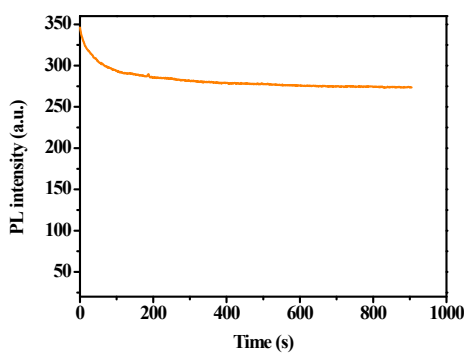

**Fig. S11** Time dependent fluorescence graph after adding Fe<sup>3+</sup>

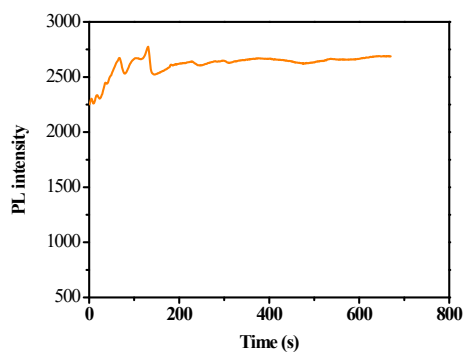

**Fig. S12** Time dependent fluorescence graph after adding AA



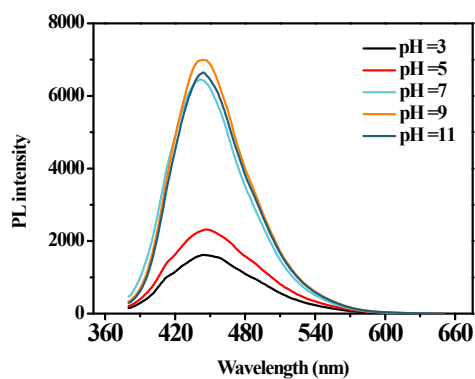

**Fig. S13** The fluorescence intensity of N-CQDs as a function of pH Values

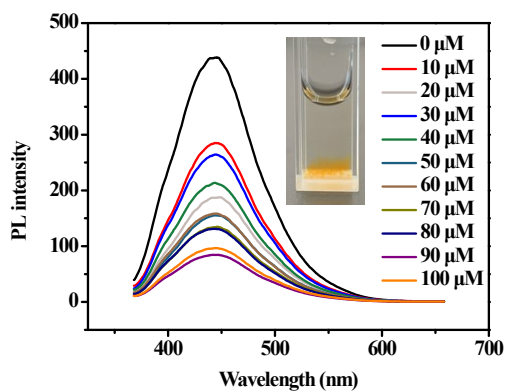

**Fig. S14** Detection of Fe<sup>3+</sup> in a solution with pH=9.18, brown precipitates appeared at the bottom of the cuvette (inset)

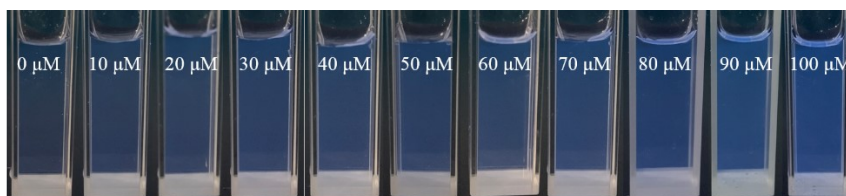

**Fig. S15** Fluorescence photos of N-CQDs/Fe<sup>3+</sup> detecting different concentrations of AA

**Table S4.** AA sensing properties with different fluorescent probes. Limit of detection  $LOD = 3\sigma/K$  (where  $\sigma$  is the standard deviation of the blank sample and  $K$  is the slope of the linear equation).

| Fluorescent probes                                                                    | Linear range ( $\mu\text{mol/L}$ ) | Applications                               | LOD                  | References |
|---------------------------------------------------------------------------------------|------------------------------------|--------------------------------------------|----------------------|------------|
| N,S co-doped carbon dots<br>(N,S-CDs)- $\text{Fe}^{3+}$                               | 10-200                             | Fruits                                     | 4.69 $\mu\text{M}$ . | [18]       |
| Nitrogen, phosphorus co-doped<br>carbon quantum dots<br>(N, P-CQDs)- $\text{Fe}^{3+}$ | 1-200                              | Fruits                                     | 0.84 $\mu\text{M}$   | [19]       |
| Red-carbon quantum dots<br>(R-CQDs)- $\text{Fe}^{3+}$                                 | 1-50                               | Human body fluids<br>and vitamin C tablets | 0.42 $\mu\text{M}$   | [20]       |
| Nitrogen-doped carbon<br>quantum dots (N-CQDs)- $\text{Fe}^{3+}$                      | 10-100                             | Medical tablet                             | 1.8 $\mu\text{M}$    | [21]       |
| Cobalt-doped carbon quantum<br>dots (Co-CQDs)- $\text{Fe}^{3+}$                       | 10-400                             | Fruits                                     | 0.27 $\mu\text{M}$   | [22]       |
| Carbon quantum dots<br>(CQDs)- $\text{Fe}^{3+}$                                       | 0-350                              | Human biological<br>samples                | 5.34 $\mu\text{M}$   | [23]       |
| N-CQDs- $\text{Fe}^{3+}$                                                              | 30-90                              | Fruits                                     | 0.81 $\mu\text{M}$   | This work  |

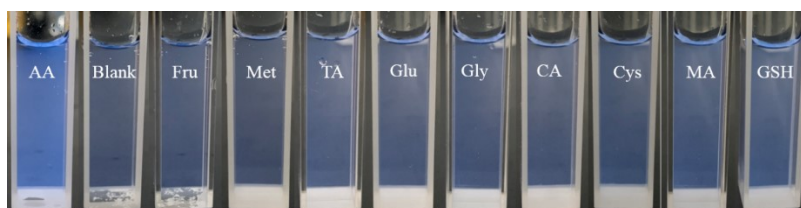

**Fig. S16** Fluorescence photos of different substances detected by N-CQDs/ $\text{Fe}^{3+}$

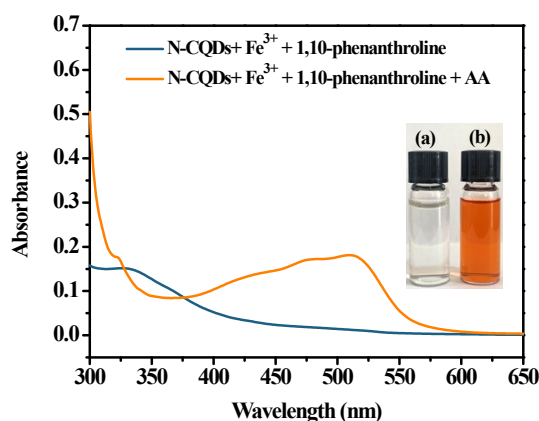

**Fig. S17** UV-vis absorption spectra of the N-CQDs +  $\text{Fe}^{3+}$  + 1,10-phenanthroline and the N-CQDs +  $\text{Fe}^{3+}$  + 1,10-phenanthroline + AA. Inset: Photographs of solutions (a) N-CQDs +  $\text{Fe}^{3+}$  + 1,10-phenanthroline and (b) N-CQDs +  $\text{Fe}^{3+}$  + 1,10-phenanthroline + AA (b) under daylight.

## References

- 1 B. K. John, N. John, B. K. Korah, C. Thara, T. Abraham and B. Mathew, *J. Photoch. Photobio. A*, 2022, **432**, 114060.
- 2 C. Yu, D. Qin, X. Jiang, X. Zheng and B. Deng, *J. Pharmaceut. Biomed.*, 2021, **192**, 113673.
- 3 C. Wang, Q. Sun, C. Li, D. Tang, H. Shi, E. Liu, P. Guo, W. Xue and J. Fan, *Mater. Res. Bull.*, 2022, **155**, 111970.
- 4 R. Chen, Z. Xing, Y. Lu, S. Li, J. Song, X. Zhang and R. Zhang, *Opt. Mater.*, 2022, **131**, 112630.
- 5 S. Patel, K. Shrivastava, D. Sinha, I. Karbhal and T. K. Patle, *Spectrochim. Acta A*, 2023, **299**, 122824.
- 6 H. Ren, M. Li, Y. Liu, T. Zhao, R. Zhang and E. Duan, *Sci. Total Environ.*, 2022, **811**, 152389.
- 7 S. Ding, P. Tan, J. Wen, T. Li and W. Wang, *Sci. Total Environ.*, 2022, **814**, 152745.
- 8 T. Y. Shen, P. Y. Jia, D. S. Chen and L. N. Wang, *Spectrochim. Acta A*, 2021, **248**, 119282.
- 9 G. Wang, S. Zhang, J. Cui, W. Gao, X. Rong, Y. Lu and C. Gao, *Anal. Chim. Acta*, 2022, **1195**, 339478.
- 10 Z. Zhai, J. Xu, T. Gong, B. Cao, K. Cui, L. Hou and C. Yuan, *Inorg. Chem. Commun.*, 2022, **140**, 109387.
- 11 X. Li, C. Wang, P. Li, X. Sun, Z. Shao, J. Xia, Q. Liu, F. Shen and Y. Fang, *Food Chem.*, 2023, **409**, 135243.
- 12 U. Latief, S. U. Islam, Z. M. S.H. Khan and M. S. Khan, *Spectrochim. Acta A*, 2021, **262**, 120132.
- 13 H. Ma, L. Guan, M. Chen, Y. Zhang, Y. Wu, Z. Liu, D. Wang, F. Wang and X. Li, *Chem. Eng. J.*, 2023, **453**, 139906.
- 14 L. Gu, J. Zhang, G. Yang, Y. Tang, X. Zhang, X. Huang, W. Zhai, E. K. Fodjo and C. Kong, *Food Chem.*, 2022, **376**, 131898.
- 15 L. Zhu, D. Shen, Q. Liu, C. Wu and S. Gu, *Appl. Surf. Sci.*, 2021, **565**, 150526.
- 16 S. R. Zhang, S. K. Cai, G. Q. Wang, J. Z. Cui and C. Z. Gao, *J. Mol. Struct.*, 2021, **1246**, 131173.
- 17 H. Ren, F. Qi, A. Labidi, A. A. Allam, J. S. Ajarem, D.W. Bahnemann and C. Wang, *ACS EST. Engg.*, 2022, **3**, 260-270.
- 18 X. Luo, W. Zhang, Y. Han, X. Chen, L. Zhu, W. Tang, J. Wang, T. Yue and Z. Li, *Food Chem.*, 2018, **258**, 214-221.
- 19 X. Li, C. Wang, P. Li, X. Sun, Z. Shao, J. Xia, Q. Liu, F. Shen and Y. Fang, *Food Chem.*, 2023, **409**, 135243.
- 20 S. Huang, B. Li, G. Ning, W. Zhang, P. Mu, S. Chen and Q. Xiao, *Anal. Methods*, 2023, **15**, 3101-3113.

- 21 L. Gu, J. Zhang, G. Yang, Y. Tang, X. Zhang, X. Huang, W. Zhai, E. K. Fodjo and C. Kong, *Food Chem.*, 2022, **376**, 131898.
- 22 C. Li, J. Zeng, D. Guo, L. Liu, L. Xiong, X. Luo, Z. Hu and F. Wu, *ACS Appl. Mater. Interfaces*, 2021, **13**, 49453-49461.
- 23 X. Gao, X. Zhou, Y. Ma, T. Qian, C. Wang and F. Chu, *Appl. Surf. Sci.*, 2019, **469**, 911-916.
